# Supplementary material for: Improving Microalgae-Based Wastewater Treatment: Impact of Organic Carbon and Light Intensity on Pollutant Removal Efficiency
Source: Research Square preprint supplement (doi:10.21203/rs.3.rs-6236750/v1), 2025-03-26
Supplement: Supplementary file 1 [file 883fc36dbe4d84a46c750558.docx]

**Supplementary Information**

**Improving Microalgae-Based Wastewater Treatment: Impact of Organic Carbon and Light Intensity on Pollutant Removal Efficiency**

XiaoNan Nie a, KaiYu Hou a, Xin Guo a, JiaJing Qin a, Yun Duan a,*

(a College of Environment and Ecology, Taiyuan University of Technology, Taiyuan, Shanxi 030024, China)

* Corresponding author:

Prof. Yun Duan,

College of Environment and Ecology,

Taiyuan University of Technology, Taiyuan, Shanxi 030024, China.

Email address: [duanyun@tyut.edu.cn](mailto:duanyun@tyut.edu.cn)

**Table S1 Theoretical COD corresponding to different organic carbons**

| organic carbon | Molecular formula | Reaction equation | Oxygen per mole | Molar mass (g/mol) | Mass of oxygen per mole（g O2） | Theoretical COD  (g O2/g) |
| --- | --- | --- | --- | --- | --- | --- |
| glucose | C6H12O6 | C6H12O6+6O2→  6CO2+6H2O | 6 | 6×12+12×1+6×16=180 | 6×32=192 | 192/180=1.07 |
| sodium acetate | CH3COO- | CH3COO-+2O2→  2CO2+2H2O | 2 | 24+3+32+23=8 | 2×32=64 | 64/82≈0.78 |
| sucrose | C12H22O11 | C12H22O11+12O2→  12CO2+11H2O | 12 | 144+22+176=342 | 12×32=384 | 384/342≈1.12 |
| starch | **(**C6H10O5**)n** | C6H10O5+6O2→  6CO2+5H2O | 6 | 6×12+10×1+5×16=162 | 6×32=192 | 192/162≈1.19 |
| **glycerin** | C3H8O3 | C3H8O3+7O2→  3CO2+4H2O | 7 | 3×12+8×1+3×16=92 | 7×32=224 | 224/92≈2.43 |
| **ethanol** | C2H6O | C2H6O+3O2→  2CO2+3H2O | 3 | 2×12+6×1+1×16=46 | 3×32=96 | 96/46≈2.09 |

**Table S2** **The amount of each organic substance added**

| organic carbon | Reserve concentration  (g L-1) | The amount added  （mL 150mL-1） | Theoretical concentration  (mg L-1) | Theoretical COD  （mg L-1） |
| --- | --- | --- | --- | --- |
| glucose | 1.5 | 10 | 100 | 106.67 |
| sodium acetate | 2.05 | 10 | 136.76 |
| sucrose | 1.43 | 10 | 95.24 |
| starch | 1.35 | 10 | 89.64 |
| **glycerin** | 0.66 | 10 | 43.90 |
| **ethanol** | 0.77 | 10 | 51.04 |
